# Supplementary material
Source: Research Square preprint supplement (doi:10.21203/rs.3.rs-8764044/v1)
Supplement: Supplementary file 1 [file 00a721386f595f138f36fbd1.docx]

**Supplementary material 3**

**Youth Navigator Mentoring and Parent/Carer Training to Improve School Engagement and Prevent Youth Offending: A Non-Randomised Cohort Feasibility Study Protocol**

**Post-session questionnaire**

**(Same items for comparison — plus reflection questions)**

**Section A: Confidence & Knowledge**

|  | 1 = Strongly Disagree | 2 = Disagree | 3 = Neutral | 4 = Agree | 5 = Strongly Agree |
| --- | --- | --- | --- | --- | --- |
| 1. I feel confident in recognising signs of child exploitation. |  |  |  |  |  |
| 1. I understand the different types of child exploitation (e.g. criminal, sexual, financial). |  |  |  |  |  |
| 1. I know what "county lines" means in the context of child exploitation. |  |  |  |  |  |
| 1. I would know what to do if I suspected a child was being exploited. |  |  |  |  |  |
| 1. I know where to go to seek help or advice regarding exploitation concerns. |  |  |  |  |  |

| **Comments:** |
| --- |

**Section B: Attitudes & Beliefs**

|  | 1 = Strongly Disagree | 2 = Disagree | 3 = Neutral | 4 = Agree | 5 = Strongly Agree |
| --- | --- | --- | --- | --- | --- |
| 1. Child exploitation is a serious issue in my local area. |  |  |  |  |  |
| 1. Any child can be at risk of exploitation, regardless of background. |  |  |  |  |  |
| 1. Children are often unable to recognise they are being exploited. |  |  |  |  |  |
| 1. It’s important to talk to children about exploitation, even if it feels uncomfortable. |  |  |  |  |  |
| 1. As a parent/carer, I have a role to play in preventing exploitation. |  |  |  |  |  |

| **Comments:** |
| --- |

**Section C: Willingness to Act**

|  | 1 = Strongly Disagree | 2 = Disagree | 3 = Neutral | 4 = Agree | 5 = Strongly Agree |
| --- | --- | --- | --- | --- | --- |
| 1. I would feel confident starting a conversation with a child I was concerned about. |  |  |  |  |  |
| 1. I would take action even if I wasn’t completely sure exploitation was happening. |  |  |  |  |  |
| 1. I feel prepared to support a young person who discloses exploitation. |  |  |  |  |  |
| 1. I feel able to respond calmly and supportively if a child disclosed something difficult. |  |  |  |  |  |

| Comments: |
| --- |

**Section D: Reflection (Optional Open Questions or 1–5 Ratings)**

|  | 1 = Strongly Disagree | 2 = Disagree | 3 = Neutral | 4 = Agree | 5 = Strongly Agree |
| --- | --- | --- | --- | --- | --- |
| 1. This training increased my confidence in recognising and responding to exploitation. (1–5 scale) |  |  |  |  |  |
| 1. This training was relevant and useful. |  |  |  |  |  |
| 1. I am more likely to have conversations with my child about this topic. |  |  |  |  |  |

| **What is one thing you will do differently as a result of this training?** |
| --- |

| **Are there any issues relating to your child/children’s safety where you would like more information?** |
| --- |

| We would like to have a brief discussion with you about the impact of this session on your day to day in around 4 weeks’ time.  Please put your **telephone number/email here** if you are happy for us to contact you. |
| --- |
