# Supplementary material
Source: Research Square preprint supplement (doi:10.21203/rs.3.rs-8764044/v1)
Supplement: Supplementary file 2 [file 1de8b5031ff313165ba8eadd.docx]

**Supplementary material 2**

**Youth Navigator Mentoring and Parent/Carer Training to Improve School Engagement and Prevent Youth Offending: A Non-Randomised Cohort Feasibility Study Protocol**

**Pre-session questionnaire**

**Instructions:** Please rate how strongly you agree or disagree with the following statements.

**Scale:**
1 = Strongly Disagree, 2 = Disagree, 3 = Neutral, 4 = Agree, 5 = Strongly Agree

**Section A: Confidence & Knowledge**

|  | 1 = Strongly Disagree | 2 = Disagree | 3 = Neutral | 4 = Agree | 5 = Strongly Agree |
| --- | --- | --- | --- | --- | --- |
| 1. I feel confident in recognising signs of child exploitation. |  |  |  |  |  |
| 1. I understand the different types of child exploitation (e.g. criminal, sexual, financial). |  |  |  |  |  |
| 1. I know what "county lines" means in the context of child exploitation. |  |  |  |  |  |
| 1. I would know what to do if I suspected a child was being exploited. |  |  |  |  |  |
| 1. I know where to go to seek help or advice regarding exploitation concerns. |  |  |  |  |  |

| **Comments:** |
| --- |

**Section B: Attitudes & Beliefs**

|  | 1 = Strongly Disagree | 2 = Disagree | 3 = Neutral | 4 = Agree | 5 = Strongly Agree |
| --- | --- | --- | --- | --- | --- |
| 1. Child exploitation is a serious issue in my local area. |  |  |  |  |  |
| 1. Any child can be at risk of exploitation, regardless of background. |  |  |  |  |  |
| 1. Children are often unable to recognise they are being exploited. |  |  |  |  |  |
| 1. It’s important to talk to children about exploitation, even if it feels uncomfortable. |  |  |  |  |  |
| 1. As a parent/carer, I have a role to play in preventing exploitation. |  |  |  |  |  |

| **Comments:** |
| --- |

**Section C: Willingness to Act**

|  | 1 = Strongly Disagree | 2 = Disagree | 3 = Neutral | 4 = Agree | 5 = Strongly Agree |
| --- | --- | --- | --- | --- | --- |
| 1. I would feel confident starting a conversation with a child I was concerned about. |  |  |  |  |  |
| 1. I would take action even if I wasn’t completely sure exploitation was happening. |  |  |  |  |  |
| 1. I feel prepared to support a young person who discloses exploitation. |  |  |  |  |  |
| 1. I feel able to respond calmly and supportively if a child disclosed something difficult. |  |  |  |  |  |

| Comments: |
| --- |
