# Supplementary material
Source: Research Square preprint supplement (doi:10.21203/rs.3.rs-8764044/v1)
Supplement: Supplementary file 3 [file 4905e884a0a7b970e3db1e7e.docx]

**Supplementary material 4**

**Youth Navigator Mentoring and Parent/Carer Training to Improve School Engagement and Prevent Youth Offending: A Non-Randomised Cohort Feasibility Study Protocol**

**Flyer content**

**Youth Mentorship & Parent Support Programme**

**For Young People and Parents/Carers**

**Who is this for?**
If a young person in your family is at risk of school exclusion, getting into trouble, or being exploited, this programme can help *[amend according to discretionary pathway]*

**What’s included?**

- **Youth Mentorship:** Biweekly one-to-one sessions with a trusted mentor who listens, supports you, helps set goals, and connects you to local services.
- **Parent/Carer Support:** A short awareness training session about keeping young people safe, plus up to four sessions with a mentor to help you feel confident supporting your child.

**Do I have to take part?**

- **Support is available to everyone identified as at risk.** You will **always get help**, even if you do not want to take part in the research.
- **Research participation is optional.** Saying “yes” means we can use anonymised process information about you or your child to see if the programme is working. Saying “no” does **not** stop you from receiving support. The evaluation is about the support process and not individuals situations.

**What kind of information will be collected?**

- Attendance at school, any suspensions or exclusions
- Any contact with the police (informal or formal)
- Feedback from young people, parents/carers, and mentors about the programme

**How will we keep your information safe?**

- All data is stored securely and only shared with the research team.
- Your personal information will **not** be shared outside the study.
- You can change your mind and withdraw your consent at any time.

**Why take part in the research?**

- Help us understand what works in keeping young people safe.
- Make services better for other young people and families in your area.

**Questions or want more information?**
Contact the research team:
[insert contact details]
