# Supplementary material
Source: Research Square preprint supplement (doi:10.21203/rs.3.rs-8764044/v1)
Supplement: Supplementary file 4 [file 9f0fc5041f5042216ffa8383.docx]

**Supplementary material 5**

**Youth Navigator Mentoring and Parent/Carer Training to Improve School Engagement and Prevent Youth Offending: A Non-Randomised Cohort Feasibility Study Protocol**

**Participant Information Leaflet**

**Study Title:** Focused Diversion Youth Mentorship and Parent/Carer Support – Feasibility Study

**Who is running the study:**
This study is run by the Thames Valley Violence Prevention Partnership (VPP) with support from local authorities. Our aim is to understand how we can best support young people and their families to prevent school disengagement and involvement in risky behaviours *[amend according to discretionary pathway].*

**Why have you been invited?**

You (or your child) have been identified as someone who may benefit from extra support to stay safe, engaged in school, and connected with local community services. We are inviting families like yours to take part in a study to see if these support programmes are feasible and acceptable.

**What does taking part involve?**

**For young people:**

- You will have a **Navigator Mentor** who meets with you **every two weeks for up to 12 weeks**.
- Sessions are led by you – you choose what you want to talk about and what goals you want to work on.
- Your mentor will help you connect with community services, support school engagement, and work through challenges you may be facing.

**For parents/carers:**

- You can take part in a **2-hour training session** on child safety and recognising risks like exploitation.
- You will have **four one-to-one sessions with a Parent/Carer Mentor** to discuss what you’ve learned and get guidance on supporting your child at home.

**Voluntary Participation**

- Taking part is **completely voluntary**.
- You can **stop at any time** without affecting the support you receive/your child receives or the services you can access.
- You can choose to have the support without being in the research study.

**What data will be collected?**

- School attendance, suspensions, and exclusions
- Any informal contact with the police
- Feedback on your experiences with the mentorship and training
- All information will be **kept confidential**, stored securely, and only accessible to the research team.

**Potential Benefits**

- Improved engagement with school and local services
- Enhanced understanding of risks and protective strategies for parents/carers
- Support in achieving goals and problem-solving challenges

**Possible Risks**

- Some discussions may feel sensitive or uncomfortable
- Support will be available if needed

**What if you do not want to take part?**

- You (or your child) can **still receive support** from the programme.

**Questions or concerns**

- Contact the research team: **[contact]**
- Contact an independent ethics advisor: **[contact]**
