# Supplementary material
Source: Research Square preprint supplement (doi:10.21203/rs.3.rs-8764044/v1)
Supplement: Supplementary file 5 [file a891101533110979c8291558.docx]

**Supplementary material 6**

**Youth Navigator Mentoring and Parent/Carer Training to Improve School Engagement and Prevent Youth Offending: A Non-Randomised Cohort Feasibility Study Protocol**

**Privacy statement**

**Your Privacy – How We Use Your Information**

**Who is collecting your information:**
The Thames Valley Violence Prevention Partnership (VPP) and Thames Valley Police (TVP) are running this study. The researchers are part of these organisations.

**Why we collect your information:**
We collect information to:

- Make sure the mentorship and parent/carer support programmes are working well
- See if they help young people go to school and take part in their community
- Plan future support programmes

**What information we collect:**

- Your name, age, and contact details
- School attendance and any suspensions or exclusions
- Police contacts (if you have had any)
- Notes on participation in the programme and feedback
- For parents/carers: your feedback from training and mentorship

**How we keep it safe:**

- All information is stored securely and only the research team can see it
- We **will not** share your personal information with anyone outside the research team
- When we write reports or share results, your information will be **anonymous**

**How long we keep it:**

- We will keep your personal information for 10 years securely

**Your rights:**

- You can ask to see the information we have about you
- You can ask us to correct anything wrong
- You can stop us from using your information in the research at any time – this will **not** affect your access to support

**Who to contact:**
If you have questions or want to stop your information being used, contact:

**Data Protection Officer, Thames Valley Violence Prevention Partnership**

Email: [Insert email]
