# Supplementary material
Source: Research Square preprint supplement (doi:10.21203/rs.3.rs-8764044/v1)
Supplement: Supplementary file 7 [file fe4083ba70e4345bdf9302ab.docx]

**Supplementary material 7**

**Youth Navigator Mentoring and Parent/Carer Training to Improve School Engagement and Prevent Youth Offending: A Non-Randomised Cohort Feasibility Study Protocol**

**Consent form: Young Person**

**Welcome to the Thames Valley Youth Mentorship Study**

**What is this about?**
We want to see if short-term mentorship can help young people like you: stay engaged in school, make safe choices, connect with community support

**What will happen?**

- You will meet a **Navigator Mentor** every two weeks for up to 12 weeks.
- You choose what to work on and set your own goals.
- Your mentor will help you access services and support.

**Do I have to take part?**

- No. Joining is **completely voluntary**.
- You can **stop at any time**.
- Saying no **will not affect any support you already receive**.

**What information will be collected?**

- School attendance, suspensions, exclusions
- Police contacts (if any)
- Feedback about your experience

**How your information will be kept safe**

- Stored securely, only study staff can see it
- Names removed from reports or publications

**Your rights**

- You can see your information
- You can ask for it to be corrected or deleted
- You can stop participating anytime

**Consent (tick boxes)**

- ☐ I understand what the study is about
- ☐ I want to take part in the mentorship
- ☐ I agree for my school and police info to be used in the study
- ☐ I know I can stop at any time
- Name: ____________________
- Signature: ________________ Date: ________

**Consent form: Parent/Carer**

**Supporting Your Child: Thames Valley Youth Mentorship Study**

**Why this study?**

- Early support can help your child stay in school, make safe choices, and reduce involvement in risky situations.
- You will get **training and mentoring support** to strengthen your capacity to guide and protect your child.

**What will happen?**

- Attend a **2-hour awareness session** on child safety, exploitation, and peer risks.
- Get **four mentor sessions** tailored to your needs.
- Mentors will help you access services and apply what you learn at home.

**Do I have to take part?**

- No. Participation is **voluntary**.
- You can **withdraw at any time** without affecting support for your child.

**What information will be collected?**

- Your feedback from training and mentoring
- School data for your child (attendance, suspensions, exclusions)
- Police contact data for your child (if any)

**How your information will be kept safe**

- Stored securely, access only by study staff
- Personal identifiers removed from reports

**Your rights**

- View, correct, or delete your data
- Stop participation anytime

**Consent (tick boxes)**

- ☐ I understand what the study is about
- ☐ I want to take part in parent/carer training
- ☐ I want to take part in parent/carer mentoring
- ☐ I agree for my child’s info and mine to be used in the study
- ☐ I know I can stop at any time
- Name: ____________________ Signature: ________________ Date: ________
